# Supplementary material for: The fabrication of an MoS2 QD–AuNP modified screen-printed electrode for the improved electrochemical detection of cefixime
Source: Royal Society of Chemistry journal article supplement (doi:10.1039/d0ay00899k), 2020-01-01
Supplement: d0ay00899k1.pdf [file d0ay00899k1.pdf]

## Fabrication of MoS<sub>2</sub> QD-AuNP Modified Screen Printed Electrode for the improved electrochemical detection of cefixime

Pinky Sagar<sup>ψ,#</sup>, Monika Srivastava<sup>φ,#</sup>, Rajiv Prakash<sup>φ</sup> S. K. Srivastava<sup>ψ\*</sup>

<sup>ψ</sup>Department of Physics, Institute of Science, Banaras Hindu University, Varanasi, 221005, India.

<sup>φ</sup>School of Materials Science and Technology, IIT (BHU) Varanasi, India- 221005

# equally contributed author

\*Corresponding Author's Email address: [sanjay\\_itbhu@yahoo.com](mailto:sanjay_itbhu@yahoo.com)

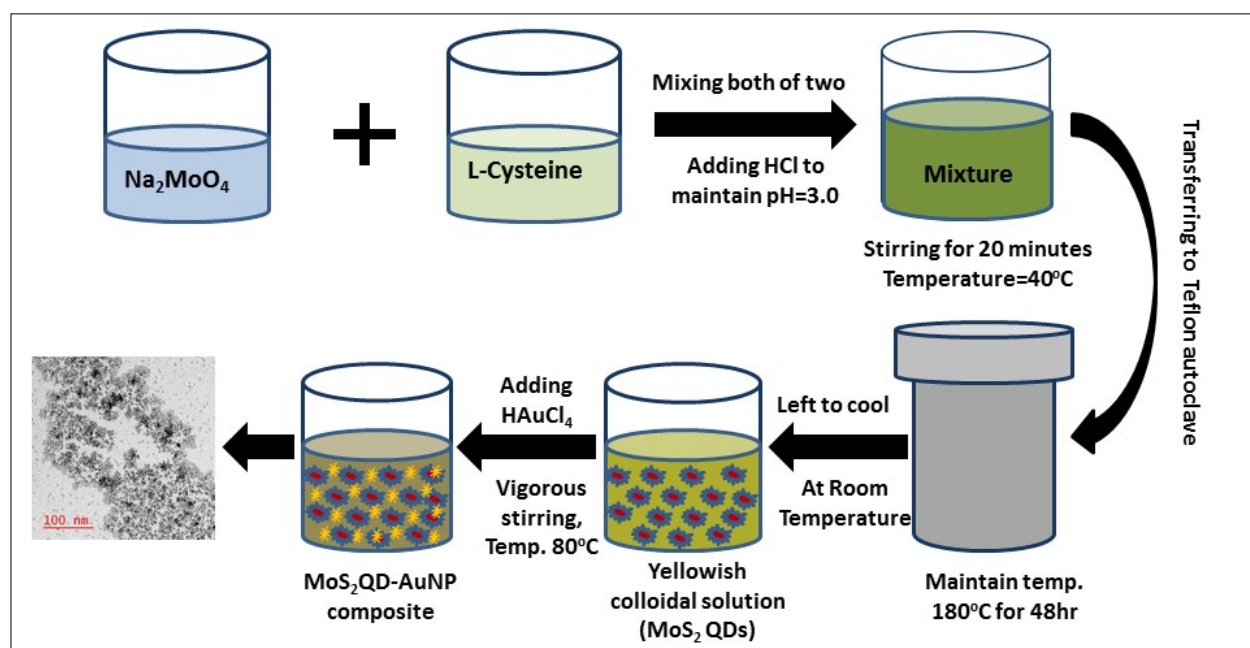

**Fig.S1.** Schematic presentation of the synthesis of MoS<sub>2</sub> QDs and MoS<sub>2</sub> QD-AuNP composite.

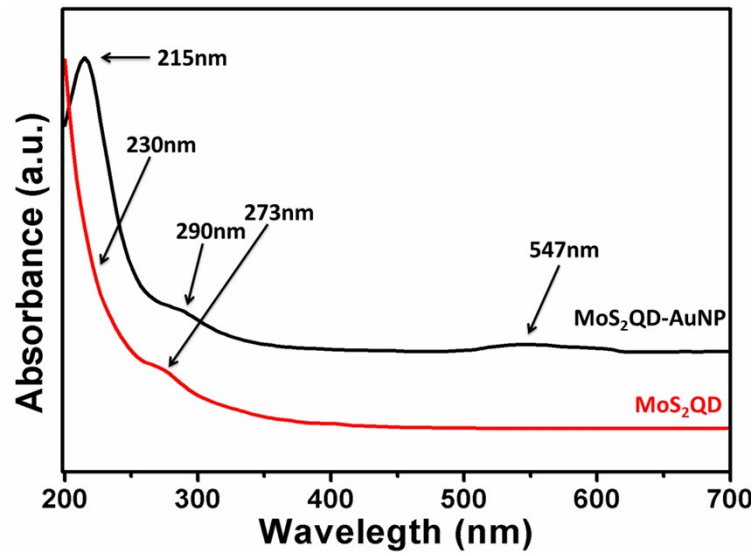

**Fig.S2.** UV-Visible Spectrum of MoS<sub>2</sub> QDs and MoS<sub>2</sub> QD-AuNP composite.

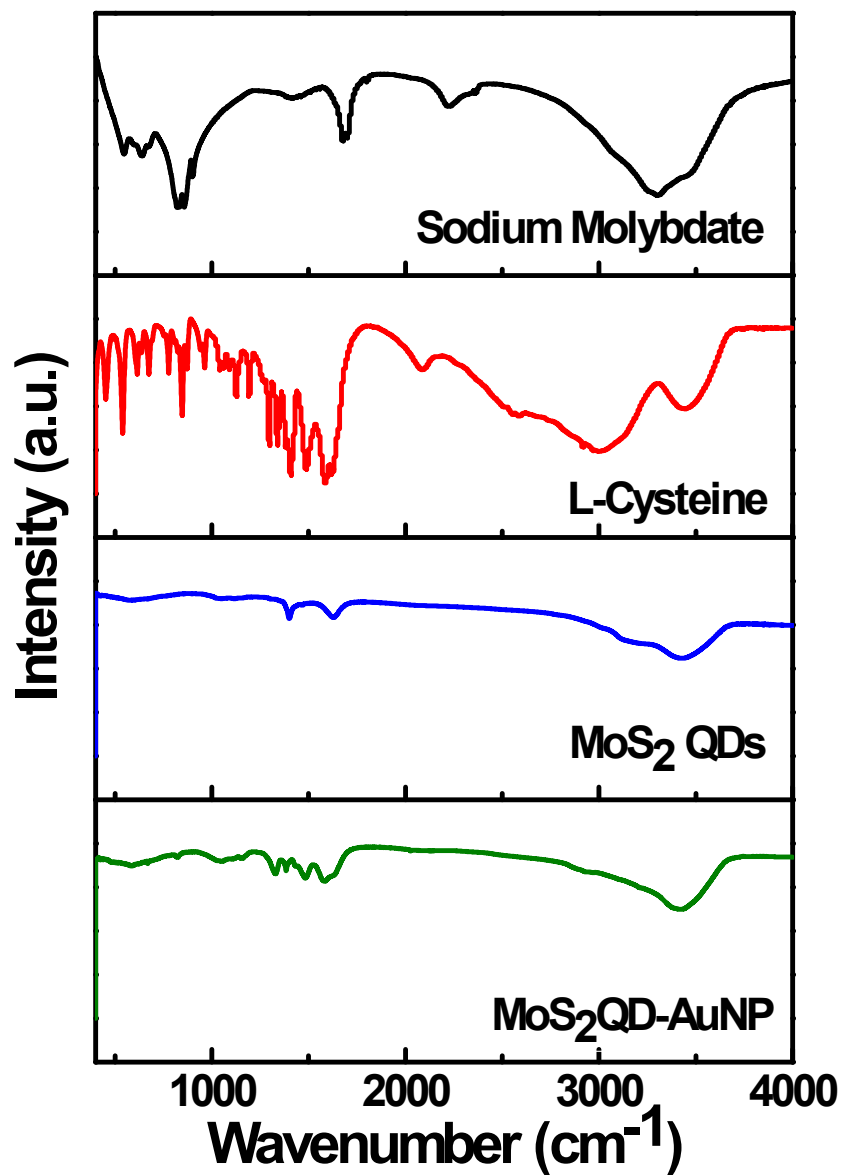

**Fig.S3.** FTIR Spectrum of MoS<sub>2</sub> QDs , MoS<sub>2</sub> QD-AuNP composite with L-cysteine and Sodium Molybdate precursor.

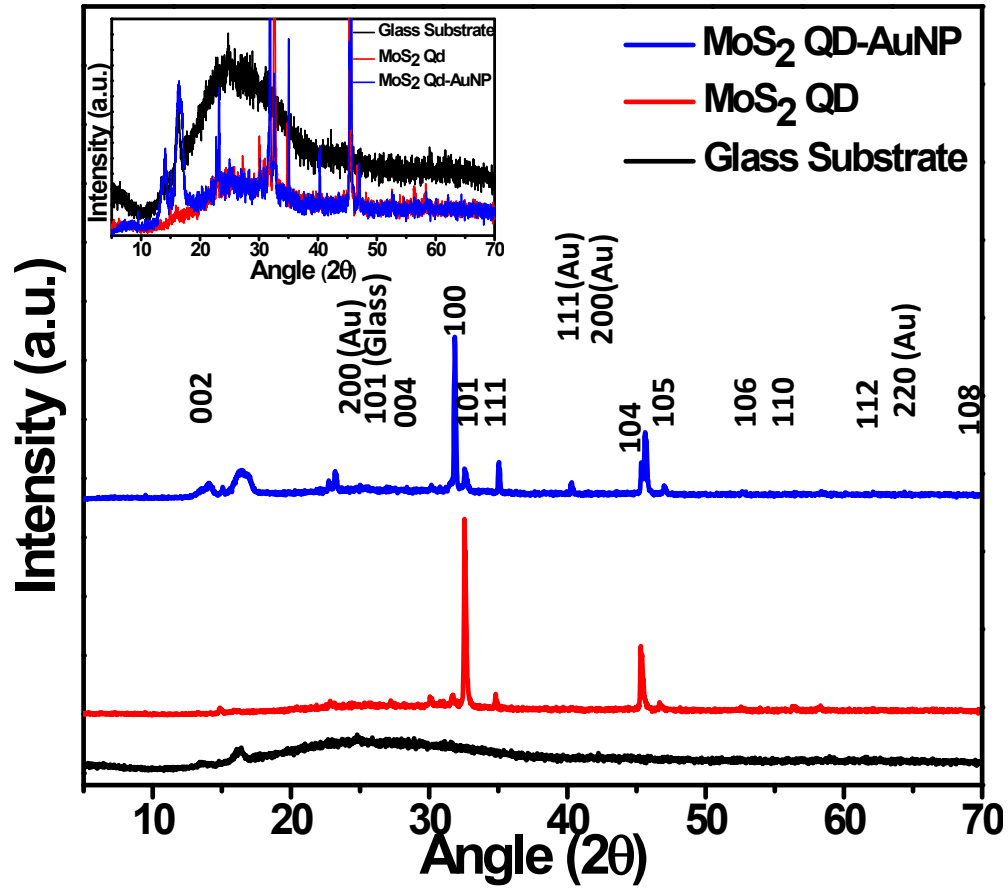

**Fig.S4.** Shows the XRD pattern of the prepared MoS<sub>2</sub> QDs and MoS<sub>2</sub> QD-AuNP composite and Glass substrate.

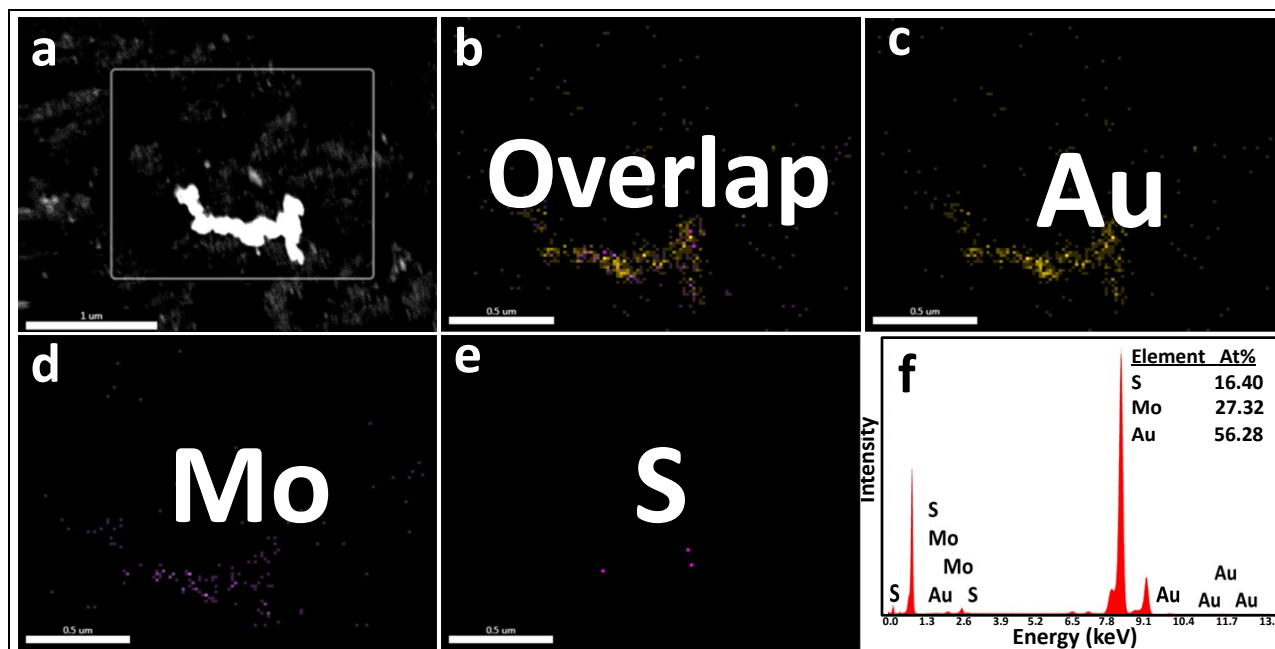

**Fig.S5.** EDAX mapping for MoS<sub>2</sub> QD-AuNP composite (scale bar 1 μm) (a) TEM image of the area to be analyzed (scale bar 1 μm), (b) overlap (scale bar 0.5 μm), (c) Au element (scale bar 0.5 μm), (d) Mo element (scale bar 0.5 μm) (e) S element (scale bar 0.5 μm) and (f) Spot profile of EDAX analysis of composition of elements.

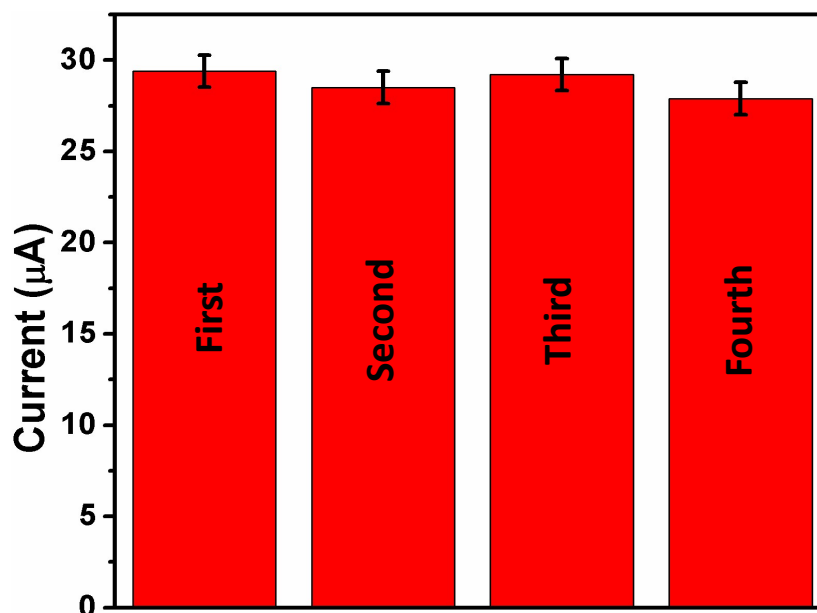

**Fig. S6.** Reproducibility test of MoS<sub>2</sub> QD-AuNP modified electrode by voltammetric detection in the presence of 50 μM of Cefixime at pH=8 and in 0.1M phosphate buffer.
